# Supplementary material for: Epigenetic Variability in the Genetically Uniform Forest Tree Species Pinus pinea L
Source: PubMed Central journal article supplement (PMC4118849; doi:10.1371/journal.pone.0103145), 2014-08-01

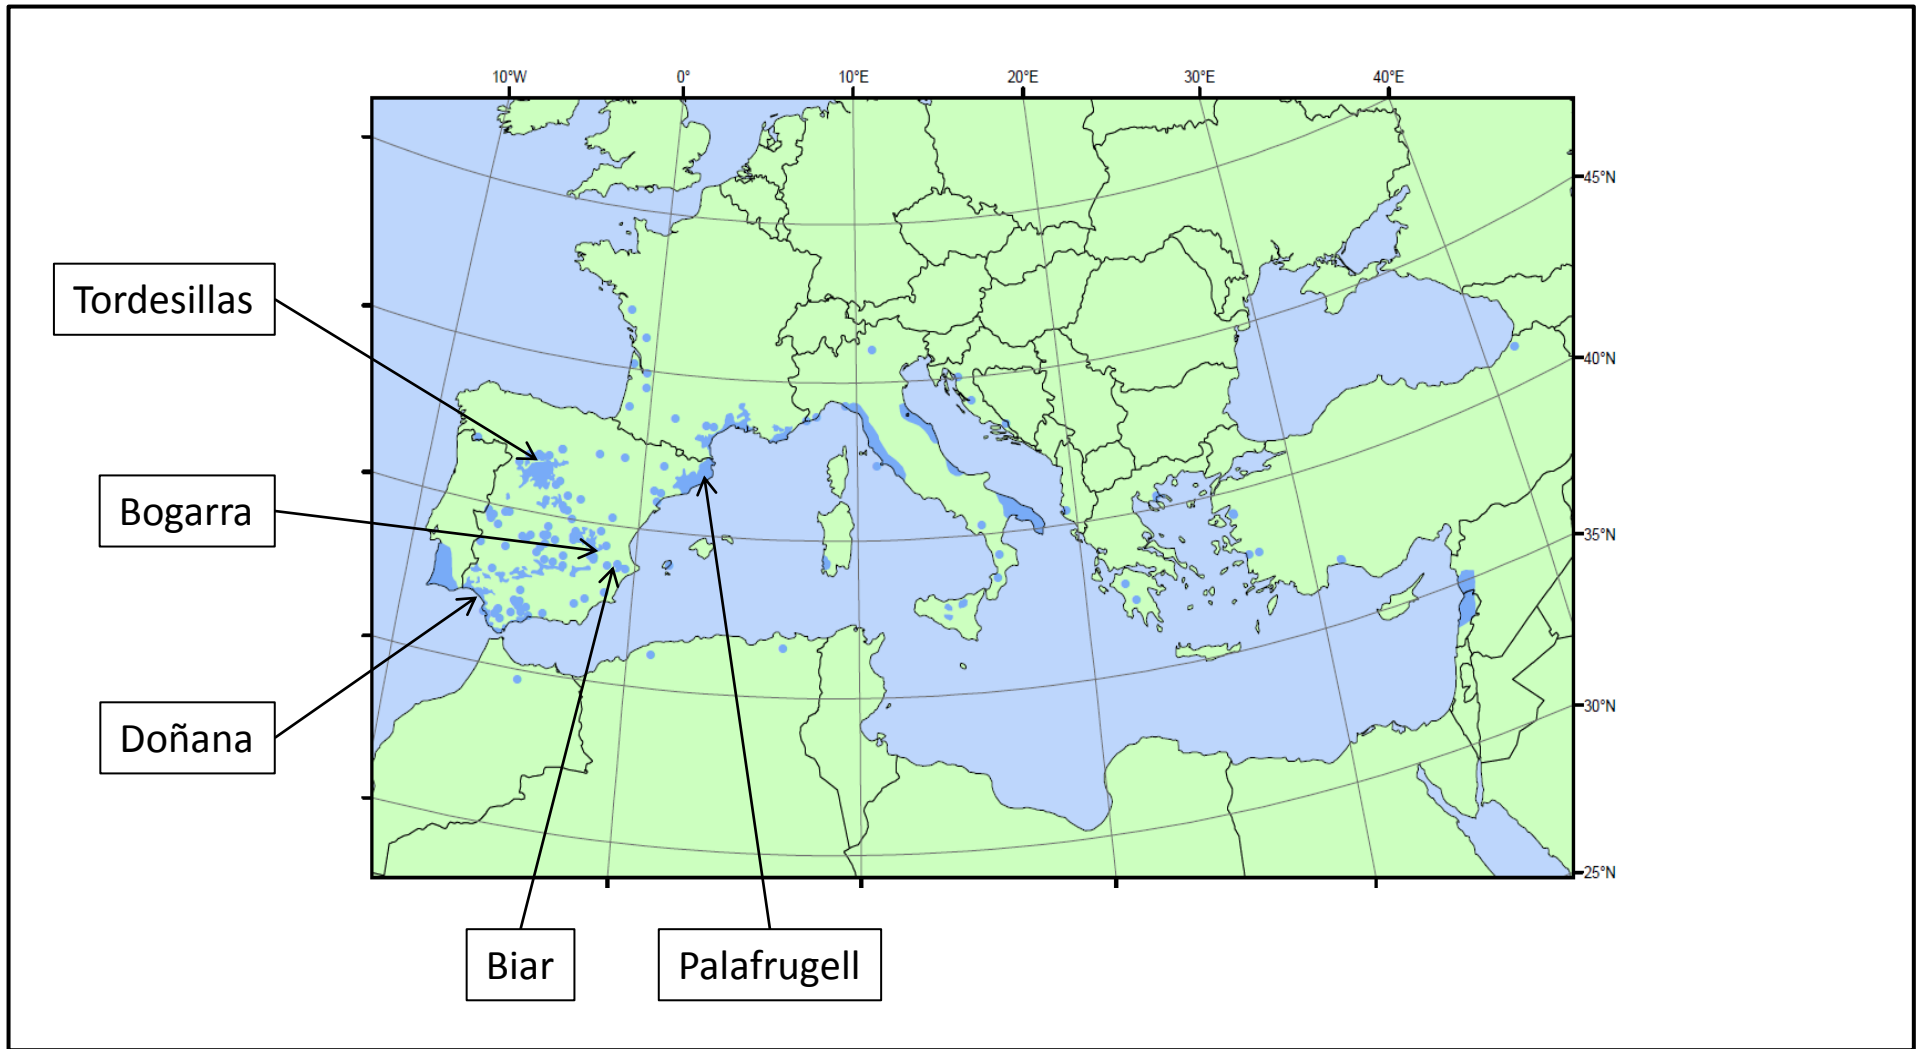

Supplement: pone.0103145.s001.pdf [file pone.0103145.s001.pdf]
