# Supplementary material for: Epigenetic Variability in the Genetically Uniform Forest Tree Species Pinus pinea L
Source: PubMed Central journal article supplement (PMC4118849; doi:10.1371/journal.pone.0103145), 2014-08-01
Supplement: pone.0103145.s003.pdf [file pone.0103145.s003.pdf]

**Table S2. Sequences of adaptors and primers used in MSAP and AFLP assays.**

| Sequence type      | Assay step              | Related endonuclease | Sequence                                       |
|--------------------|-------------------------|----------------------|------------------------------------------------|
| Adaptors           | Ligation                | <i>EcoRI</i>         | 5'CTCGTAGACTGCGTACC / 5'AATTGGTACGCAGTC        |
|                    |                         | <i>HpaII/MspI</i>    | 5'GACGATGAGTCTCGAT / 5'CGATCGAGACTCAT          |
|                    |                         | <i>MseI</i>          | 5'GACGATGAGTCCTGAG / 5'TACTCAGGACTCAT          |
| Primer combination | Pre-amplification       | <i>EcoRI</i>         | 5'GACTGCGTACCAATTC-A                           |
|                    |                         | <i>HpaII/MspI</i>    | 5'GATGAGTCTCGATCGG-A                           |
|                    |                         | <i>MseI</i>          | 5'ATGAGTCCTGAGTAA-C                            |
|                    | Selective Amplification | <i>EcoRI</i>         | 5'GACTGCGTACCAATTC-AAC/ACA/ACT/ACG/ATC/ACC/CCA |
|                    |                         | <i>HpaII/MspI</i>    | 5'GATGAGTCTCGATCGG-AAT/ACT/ATC                 |
|                    |                         | <i>MseI</i>          | 5'ATGAGTCCTGAGTAA- CCA                         |
