# Supplementary material for: Epigenetic Variability in the Genetically Uniform Forest Tree Species Pinus pinea L
Source: PubMed Central journal article supplement (PMC4118849; doi:10.1371/journal.pone.0103145), 2014-08-01
Supplement: pone.0103145.s004.pdf [file pone.0103145.s004.pdf]

**Table S3. MSAP markers showing statistically significant epigenetic differentiation among populations.**

| MSAP marker id. | Fixation index ( $F_{ST}$ ) | p-value |
|-----------------|-----------------------------|---------|
| 7               | 0,8686                      | <0,0001 |
| 14              | 0,7738                      | <0,0001 |
| 19              | 1                           | <0,0001 |
| 20              | 1                           | <0,0001 |
| 21              | 0,3833                      | 0,0068  |
| 24              | 0,7655                      | <0,0001 |
| 35              | 0,5324                      | 0,0108  |
| 46              | 0,4593                      | 0,0166  |
| 49              | 1                           | <0,0001 |
| 51              | 0,8472                      | <0,0001 |
| 52              | 0,4790                      | <0,0001 |
| 76              | 0,6399                      | <0,0001 |
| 78              | 0,5348                      | 0,0010  |
| 82              | 0,3668                      | 0,0176  |
| 89              | 0,4412                      | 0,0020  |
| 91              | 1                           | <0,0001 |
| 94              | 0,8867                      | <0,0001 |
| 98              | 0,3513                      | 0,0352  |
| 105             | 1                           | <0,0001 |
| 115             | 0,3431                      | 0,0420  |
| 122             | 1                           | <0,0001 |
| 125             | 0,8443                      | <0,0001 |
| 132             | 1                           | <0,0001 |
| 138             | 1                           | <0,0001 |
| 139             | 1                           | <0,0001 |
| 144             | 1                           | <0,0001 |
| 149             | 0,8173                      | 0,0010  |
| 151             | 1                           | <0,0001 |
| 154             | 1                           | <0,0001 |
| 161             | 0,4477                      | 0,0284  |
| 171             | 0,9229                      | <0,0001 |
| 176             | 0,8842                      | <0,0001 |
| 185             | 0,8012                      | <0,0001 |
| 189             | 0,8548                      | <0,0001 |
| 190             | 0,8185                      | <0,0001 |
| 191             | 0,3582                      | 0,0499  |
| 203             | 1                           | 0,0010  |
| 204             | 1                           | <0,0001 |
| 205             | 0,6779                      | 0,0010  |
| 211             | 0,8662                      | <0,0001 |
| 217             | 0,5296                      | <0,0001 |
| 222             | 0,4014                      | 0,0059  |
| 224             | 1                           | <0,0001 |
| 240             | 1                           | <0,0001 |
| 241             | 0,3064                      | 0,0166  |
| 251             | 0,3906                      | 0,0020  |
| 253             | 1                           | <0,0001 |
| 255             | 1                           | <0,0001 |
| 264             | 0,4739                      | 0,0020  |
| 265             | 0,8509                      | <0,0001 |
| 266             | 1                           | <0,0001 |
| 270             | 1                           | <0,0001 |
