# Supplementary material for: Epigenetic Variability in the Genetically Uniform Forest Tree Species Pinus pinea L
Source: PLoS One. 2014 Aug 1;9(8):e103145. doi: 10.1371/journal.pone.0103145 (PMC4118849; doi:10.1371/journal.pone.0103145)
Supplement: Table S4 — Binary matrix codifying the scoring of the MSAP fragment patterns for both primer combinations. First and second numbers on each cell represent the independent scoring of EcoRI/HpaII and EcoRI/MspI patterns, respectively. The scoring codes were 1 for fragment presence, 0 for fragment absence, and 9 for missing data. (XLSX) [file pone.0103145.s005.xlsx]

## Sheet: MSAP scores
Population	Tordesillas																																			Borraga
Propagated tree ID	3			7						12			13				24				25						27					29				13			14						18
Marker ID (col) / Ramet Number (rows)	1	2	3	1	2	3	4	5	6	1	2	3	1	2	3	4	1	2	3	4	1	2	3	4	5	6	1	2	3	4	5	1	2	3	4	1	2	4	1	2	3	4	5	6	1	2	3	4	5
1	11	11	11	11	11	11	11	11	11	11	11	11	11	11	11	11	11	11	11	11	11	11	11	11	11	11	11	91	11	11	11	11	11	11	11	11	11	11	11	11	11	11	11	11	11	11	11	11	11
4	11	11	11	11	11	11	11	11	11	11	11	11	11	11	11	11	11	11	11	11	11	11	11	11	11	11	11	91	11	11	11	11	11	11	11	11	11	11	11	11	11	11	11	11	11	11	11	11	11
6	01	01	01	01	01	01	01	01	01	01	01	01	01	01	11	11	01	01	01	01	01	01	01	01	01	01	01	91	01	01	01	01	01	01	01	01	01	01	01	01	01	01	01	01	01	01	01	01	01
7	11	11	11	01	01	01	01	01	01	01	01	01	11	11	01	01	01	01	01	01	11	11	11	11	11	11	01	91	01	01	01	11	11	11	11	11	11	11	11	11	11	11	11	11	11	11	11	11	11
8	11	11	11	11	11	11	11	11	11	11	11	11	11	11	11	11	11	11	11	11	11	11	11	11	11	11	11	91	11	11	11	11	11	11	11	19	19	19	11	91	11	11	11	11	11	11	11	11	11
9	01	01	01	01	01	01	01	01	01	01	01	01	01	01	01	01	01	01	01	01	01	01	01	01	01	01	01	91	01	01	01	01	01	01	01	01	01	01	01	01	01	01	01	01	01	01	01	01	01
10	11	11	11	11	11	11	11	11	11	11	11	11	11	11	11	11	11	11	11	11	11	11	11	11	11	11	11	91	11	11	11	11	11	11	11	11	11	11	11	11	11	11	11	11	11	11	11	11	11
11	11	11	11	11	11	11	11	11	11	11	11	11	11	11	11	11	11	11	11	11	11	11	11	11	11	11	11	91	11	11	11	11	11	11	11	11	01	11	11	11	11	11	11	11	11	11	11	11	11
12	01	01	01	01	01	01	01	01	01	01	01	01	01	01	00	00	01	01	01	01	01	01	00	01	01	01	01	01	01	01	01	01	01	01	01	01	01	01	01	01	01	01	01	01	01	01	01	01	01
13	01	01	01	01	01	01	01	01	01	01	01	01	01	01	01	01	01	01	01	01	01	01	01	01	01	01	01	91	01	01	01	01	01	01	01	01	01	01	01	01	01	01	01	01	01	01	01	01	01
14	11	11	11	11	11	11	11	11	11	11	11	11	01	01	11	11	11	11	11	11	11	11	11	11	11	11	01	91	01	01	01	11	11	11	11	01	01	01	01	01	01	01	01	01	01	01	01	01	01
15	01	01	01	01	01	01	01	01	01	01	01	01	01	01	01	01	01	01	01	01	01	01	01	01	01	01	01	01	01	01	01	01	01	01	01	01	01	01	01	01	01	01	01	01	01	01	01	01	01
16	11	11	11	11	11	11	11	11	11	11	11	11	11	11	11	11	11	11	11	11	11	11	11	11	11	11	11	91	11	11	11	11	11	11	11	11	11	11	11	11	11	11	11	11	11	11	11	11	11
17	11	11	11	11	11	11	11	11	11	11	11	11	11	11	11	11	11	11	11	11	11	11	11	11	11	11	11	91	11	11	11	11	11	11	11	11	11	11	11	11	11	11	11	11	11	11	11	11	11
18	11	11	11	11	11	11	11	11	11	11	11	11	11	11	11	11	11	01	11	11	11	11	11	11	11	11	11	91	11	11	11	11	11	11	11	11	11	11	11	11	11	11	11	11	11	11	11	11	11
19	01	01	01	01	01	01	01	01	01	01	01	01	01	01	01	01	01	01	01	01	11	11	11	11	11	11	01	91	01	01	01	01	01	01	01	01	01	01	01	01	01	01	01	01	01	01	01	01	01
20	11	11	11	01	01	01	01	01	01	01	01	01	01	01	01	01	11	11	11	11	11	11	11	11	11	11	01	91	01	01	01	01	01	01	01	11	11	11	11	11	11	11	11	11	11	11	11	11	11
21	00	00	00	10	00	10	10	10	00	10	10	10	00	00	00	00	00	00	00	10	00	00	10	90	00	00	00	90	00	00	00	10	00	10	10	90	00	00	00	00	00	00	00	00	00	00	00	00	00
23	00	00	00	00	00	00	00	00	00	11	11	11	00	00	00	00	00	00	00	00	00	00	00	00	00	00	00	90	00	00	00	00	00	00	00	00	00	00	00	00	00	00	00	00	00	00	00	00	00
24	01	01	01	01	01	01	01	01	01	01	01	01	01	01	01	01	01	01	01	01	01	01	01	01	01	01	01	91	01	01	01	01	01	11	01	11	11	11	01	01	01	01	01	01	01	01	01	01	01
27	11	11	11	11	11	11	11	11	11	11	11	11	11	11	11	11	11	11	11	11	11	11	11	11	11	11	11	91	11	11	11	11	11	11	11	11	11	11	11	11	11	11	11	11	11	11	11	11	11
30	01	01	01	01	01	01	01	01	01	01	01	01	01	01	01	01	01	01	01	01	01	01	01	01	01	01	01	01	01	01	01	01	01	01	01	01	01	01	01	01	01	01	01	01	01	01	01	01	01
31	11	11	11	11	11	11	11	11	11	11	11	11	11	11	11	11	11	11	11	11	11	11	11	11	11	11	11	91	11	11	11	11	11	11	11	11	11	11	11	11	11	11	11	11	11	11	11	11	11
32	11	11	11	11	11	11	11	11	11	11	11	11	11	11	11	11	11	11	11	11	11	11	11	11	11	11	11	91	11	11	11	11	11	11	11	11	11	11	11	11	11	11	11	11	11	11	11	11	11
33	01	01	01	01	01	01	01	01	01	01	01	01	01	01	01	01	01	01	01	01	01	01	01	01	01	01	01	01	01	01	01	01	01	01	01	01	01	01	01	01	01	01	01	01	01	01	01	01	01
34	01	01	01	01	01	01	01	01	01	01	01	01	01	01	01	01	01	01	01	01	01	01	01	01	01	01	01	91	01	01	01	01	01	01	01	01	01	01	01	01	01	01	01	01	01	11	11	01	11
35	01	01	01	01	01	01	01	01	01	01	01	01	01	01	01	01	01	01	01	01	01	01	01	01	01	01	01	91	01	01	01	01	01	01	01	01	01	01	01	01	01	01	01	01	01	11	11	01	11
37	01	01	01	01	01	01	01	01	01	01	01	01	01	01	01	01	01	01	01	01	01	01	01	01	01	01	01	91	01	01	01	01	01	01	01	01	01	01	01	01	01	01	01	01	01	01	01	01	01
38	00	00	00	00	00	10	10	10	00	10	00	10	00	00	00	00	10	10	00	10	00	00	10	10	00	00	00	90	00	00	00	10	00	10	10	00	00	00	00	00	00	00	00	00	00	00	00	00	00
40	00	00	00	00	00	00	00	00	00	00	00	00	00	00	00	00	11	00	00	00	00	00	00	00	00	00	00	90	00	00	00	00	00	00	00	00	00	00	00	00	00	00	00	00	00	00	00	00	00
41	01	01	01	01	01	01	01	01	01	01	01	01	01	01	01	01	01	01	01	01	01	01	01	01	01	01	01	91	01	01	01	01	01	01	01	01	01	01	01	01	01	01	01	01	01	01	01	01	01
42	01	01	01	01	01	01	01	01	01	01	01	01	01	01	01	01	01	01	01	01	01	01	01	01	01	01	01	91	01	01	01	01	01	01	01	01	01	01	01	01	01	01	01	01	01	01	01	01	01
45	01	01	01	01	01	01	01	01	01	01	01	01	01	01	01	01	01	01	01	01	01	01	01	01	01	01	01	91	01	01	01	01	01	01	01	01	01	01	01	01	01	01	01	01	01	01	01	01	01
46	00	00	00	00	00	00	00	00	00	00	00	00	00	00	00	00	00	00	00	00	00	00	00	00	00	00	00	90	00	00	00	00	00	00	00	10	10	90	00	90	90	10	10	10	10	10	00	00	10
49	00	00	00	01	01	01	01	01	01	01	01	01	01	01	01	01	00	00	00	00	01	01	01	01	01	01	01	91	01	01	01	01	01	01	01	01	01	01	01	01	01	01	01	01	01	01	01	01	01
50	11	11	11	11	11	11	11	11	11	11	91	11	11	11	11	11	11	11	11	11	11	11	11	11	11	11	11	91	11	11	11	11	11	11	11	11	11	11	11	11	11	11	11	11	11	11	11	11	11
51	01	01	01	01	01	01	01	01	01	01	01	01	00	00	01	01	01	01	01	01	00	00	00	00	00	00	01	91	01	01	01	00	00	10	00	00	00	00	00	00	00	00	00	00	00	00	00	00	00
52	00	00	00	00	00	00	00	00	00	00	00	00	00	00	00	00	10	00	00	10	00	00	10	00	10	10	10	90	10	10	00	00	00	00	00	00	00	00	00	00	00	00	00	00	10	00	00	00	00
55	01	01	01	11	01	11	11	11	01	11	01	11	01	11	01	11	01	01	01	01	01	01	11	11	01	01	01	91	01	01	01	11	01	01	01	01	01	01	01	01	01	01	01	01	01	01	01	01	01
56	01	01	01	01	01	01	01	01	01	01	01	01	01	01	01	01	01	01	01	01	01	01	01	01	01	01	01	91	01	01	01	01	01	01	01	01	01	01	01	01	01	01	01	01	01	01	01	01	01
57	10	10	10	10	10	10	10	10	10	10	10	10	10	10	10	10	10	90	10	10	10	10	10	10	10	10	10	90	10	10	10	10	10	10	10	10	10	10	10	90	10	10	10	10	10	10	10	10	10
58	01	01	01	11	11	11	01	01	01	01	01	01	01	01	01	01	01	11	01	01	01	01	01	01	01	11	01	91	01	01	01	01	01	01	01	11	01	01	01	01	01	01	01	01	01	01	01	01	01
63	11	11	11	11	11	11	11	11	11	11	11	11	11	11	11	11	01	11	11	11	11	11	11	01	11	11	11	91	11	01	01	11	11	11	11	11	11	11	11	01	11	11	11	11	91	11	11	01	11
65	11	11	11	11	11	11	11	11	11	11	11	11	11	11	11	11	11	11	11	11	11	11	11	11	11	11	11	91	11	11	11	11	11	11	11	11	11	11	11	11	11	11	11	11	11	11	11	11	11
66	01	01	01	01	01	01	01	01	01	01	01	01	01	01	01	01	01	01	01	01	01	01	01	01	01	01	01	01	01	01	01	01	01	01	01	01	01	01	01	01	01	01	01	01	01	01	01	01	01
67	11	11	11	11	11	11	11	11	11	11	11	11	11	11	11	11	11	11	11	11	11	11	11	11	11	11	11	91	11	11	11	11	11	11	11	11	11	11	11	11	11	11	11	11	11	11	11	11	11
69	11	11	11	11	11	11	11	11	11	11	11	11	11	11	11	11	11	11	11	11	11	11	11	11	11	11	11	91	11	11	11	11	11	11	11	11	11	11	11	11	11	11	11	11	11	11	11	11	11
70	11	11	11	11	11	11	11	11	11	11	11	11	11	11	11	11	11	11	11	11	11	11	11	11	11	11	11	91	11	11	11	11	11	11	11	11	11	11	11	11	11	11	11	11	11	11	11	11	11
72	10	10	10	10	10	10	10	10	10	10	10	10	10	10	10	10	10	10	10	10	10	10	10	10	10	10	10	90	10	10	10	10	10	10	10	10	10	10	10	10	10	10	10	10	10	10	10	10	10
73	01	01	01	01	01	01	01	01	01	01	01	01	01	01	01	01	01	01	01	01	01	01	01	01	01	01	01	91	01	01	01	01	01	01	01	01	01	01	01	01	01	01	01	01	01	01	01	01	01
75	11	11	11	11	11	11	11	11	11	11	11	11	11	11	11	11	11	11	11	11	11	11	11	11	11	11	11	91	11	11	11	11	11	11	11	11	11	11	11	11	11	11	11	11	11	11	11	11	11
76	11	11	11	01	01	01	01	01	01	11	11	11	01	01	11	11	01	01	01	01	01	01	01	01	01	01	01	91	01	01	01	11	11	11	01	01	01	01	01	01	01	01	01	01	11	11	11	01	11
77	01	01	01	01	01	01	01	01	01	01	01	01	01	01	01	01	01	01	01	01	01	01	01	01	01	01	01	91	01	01	01	01	01	01	01	01	01	01	01	01	01	01	91	91	11	11	91	01	11
78	11	11	11	11	11	11	11	11	11	11	01	11	11	11	11	11	11	91	11	11	11	11	11	11	11	11	11	91	11	11	11	11	11	11	11	01	01	01	01	01	01	01	01	01	01	01	01	01	01
79	11	11	11	11	11	11	11	11	11	11	11	11	11	11	11	11	11	11	11	11	11	11	11	11	11	11	11	91	11	11	11	11	11	11	11	11	11	11	11	91	11	11	11	11	11	11	11	91	11
80	11	11	11	11	11	11	11	11	11	11	11	11	11	11	11	11	11	11	11	11	11	11	11	11	11	11	11	91	11	11	11	11	11	11	11	11	11	11	11	91	11	11	11	11	11	11	11	91	11
81	00	00	00	00	00	00	00	00	00	00	00	00	00	00	00	00	00	00	00	00	00	00	00	00	00	00	00	90	00	00	00	00	00	00	00	00	00	00	11	00	00	00	00	00	00	00	00	00	00
82	01	01	01	01	01	01	01	01	01	91	91	11	01	01	01	01	01	91	01	11	01	01	11	91	01	01	01	91	01	01	01	11	01	11	11	01	01	01	01	01	01	01	01	01	01	01	01	01	01
83	11	11	11	11	11	11	11	11	11	11	11	11	11	11	11	11	11	11	11	11	11	11	11	11	11	11	11	91	11	11	91	11	11	11	11	11	11	11	11	11	11	11	11	11	11	11	11	11	11
84	11	11	11	11	11	11	11	11	11	11	11	11	11	11	11	11	11	11	11	11	11	11	11	11	11	11	11	91	11	11	11	11	11	11	11	11	11	11	11	11	11	11	11	11	11	11	11	11	11
85	01	01	01	01	01	01	01	01	01	01	01	01	01	01	01	01	01	01	01	01	01	01	01	01	01	01	01	91	01	01	01	01	01	11	01	01	01	01	01	91	01	01	01	01	01	01	91	01	01
86	11	11	11	11	11	11	11	11	11	11	11	11	11	11	11	11	11	11	11	11	11	11	11	11	11	11	11	91	11	11	11	11	11	11	11	11	11	11	11	11	11	11	11	11	11	11	11	11	11
87	00	00	00	00	00	00	00	00	00	00	00	00	00	00	00	00	00	00	00	00	00	00	00	00	00	00	00	90	00	00	00	00	00	00	00	00	00	00	00	00	00	00	00	00	00	00	00	00	00
88	11	11	11	11	11	11	11	11	11	11	11	11	11	11	11	11	11	11	11	11	11	11	11	11	11	11	11	91	11	11	11	11	11	11	11	11	11	11	11	11	11	11	11	11	01	11	11	01	11
89	00	00	00	10	10	10	10	10	90	10	10	00	00	00	00	00	00	10	00	90	00	10	10	10	10	10	10	90	10	10	00	10	10	10	00	11	11	11	11	11	11	11	11	11	11	11	11	11	11
90	11	11	11	11	11	11	11	11	11	11	11	11	11	11	11	11	11	11	11	11	11	11	11	11	11	11	11	91	11	11	11	11	11	11	11	11	11	11	11	11	11	11	11	11	11	11	11	11	11
91	01	01	01	01	01	01	01	01	01	01	01	01	01	01	01	01	01	01	01	01	01	01	01	01	01	01	01	91	01	01	01	01	01	01	01	01	01	01	01	01	01	01	01	01	01	01	01	01	01
92	11	11	11	11	11	11	11	11	11	11	11	11	11	11	11	11	11	11	11	11	11	11	11	11	11	11	11	91	11	11	11	11	11	11	11	11	11	11	11	11	11	11	11	11	11	11	11	11	11
93	00	00	00	00	00	00	00	00	00	00	00	00	00	00	00	00	00	00	00	00	00	00	00	00	00	00	11	90	11	00	00	00	11	00	00	00	00	00	00	90	00	00	00	00	00	00	00	00	00
94	01	01	01	01	01	01	01	01	01	11	11	11	01	01	01	01	11	01	01	11	01	01	01	01	01	01	01	91	01	01	01	01	01	01	01	01	01	01	11	91	11	11	11	11	11	11	11	11	11
96	00	00	00	00	00	00	00	00	00	00	00	00	11	00	00	00	00	00	00	00	00	00	00	00	00	00	00	90	00	00	00	00	00	00	00	00	00	00	00	00	00	00	00	00	00	00	00	00	00
97	11	11	11	11	11	11	11	11	11	11	11	11	11	11	11	11	11	11	11	11	11	11	11	11	11	11	11	91	11	11	01	11	11	11	11	11	11	11	11	11	11	11	11	11	11	11	11	11	11
98	01	01	01	01	01	01	01	01	01	01	01	01	01	01	01	01	01	01	01	01	01	01	01	01	01	01	01	91	01	01	01	01	01	01	01	01	01	01	01	01	01	01	01	01	01	11	11	01	11
99	11	11	11	11	11	11	11	11	11	11	11	11	11	11	11	11	11	11	11	11	11	11	11	11	11	11	11	91	11	11	11	11	11	11	11	11	11	11	11	11	11	11	11	11	11	11	11	11	11
101	11	11	11	11	11	11	11	11	11	11	11	11	11	11	11	11	11	11	11	11	11	11	11	11	11	11	11	91	11	11	11	11	11	11	11	11	11	11	11	11	11	11	11	11	11	11	11	11	11
102	11	11	11	11	11	11	11	11	11	11	11	11	11	11	11	11	11	11	11	11	11	11	11	11	11	11	11	91	11	11	11	11	11	11	11	11	11	11	11	91	11	11	11	11	11	11	11	11	11
103	00	00	00	00	00	00	00	00	00	00	00	00	00	00	00	00	00	00	00	00	00	00	00	00	00	00	00	90	00	00	00	00	00	10	00	00	00	00	00	90	00	00	00	00	00	00	00	00	00
104	01	01	01	01	01	01	01	01	01	01	01	01	01	01	01	01	01	01	01	01	01	01	01	01	01	01	01	91	01	01	01	01	01	01	01	01	01	01	01	01	01	01	01	01	01	01	01	01	01
105	01	01	01	11	11	11	11	11	11	01	01	01	01	01	01	01	01	01	01	01	01	01	01	01	01	01	01	91	01	01	01	01	01	01	01	01	01	01	01	91	01	01	01	01	01	01	01	01	01
106	11	11	11	11	11	11	11	11	11	11	11	11	11	11	11	11	11	11	11	11	11	11	11	11	11	11	11	91	11	11	11	11	11	11	11	11	11	11	11	11	11	11	11	11	11	11	11	11	11
108	00	00	00	00	00	00	00	00	00	00	00	00	00	00	00	00	00	00	00	00	00	00	00	00	00	00	00	00	00	00	00	00	00	00	00	00	00	00	00	00	00	00	00	00	00	00	00	00	00
109	01	01	01	01	01	01	01	01	01	01	01	01	01	01	01	01	01	01	01	01	01	01	01	01	01	01	01	01	01	01	01	01	01	01	01	01	01	01	01	01	01	01	01	01	01	01	01	01	01
110	01	01	01	01	01	01	01	01	01	01	01	01	01	01	01	01	01	01	01	01	01	01	01	01	01	01	01	91	01	01	01	01	01	01	01	01	01	01	01	91	01	01	01	01	01	01	01	91	01
111	01	01	01	01	01	01	01	01	01	01	01	01	01	01	01	01	01	01	01	01	01	01	01	01	01	01	01	91	01	01	01	01	01	01	01	01	01	01	01	91	01	01	01	01	01	01	01	91	01
112	11	11	11	11	11	11	11	11	11	11	11	11	11	11	11	11	11	11	11	11	11	11	11	11	11	11	11	91	11	11	11	11	11	11	11	11	11	11	11	91	11	11	11	11	11	11	11	11	11
113	01	01	01	01	01	01	01	01	01	01	01	01	01	01	01	01	01	01	01	01	01	01	01	01	01	01	01	01	01	01	01	01	01	01	01	01	01	01	01	01	01	01	01	01	01	01	01	01	01
114	11	11	11	11	11	11	11	11	11	11	11	11	11	11	11	11	11	11	11	11	11	11	11	11	11	11	11	91	11	11	11	11	11	11	11	11	11	11	11	91	11	11	11	11	11	11	11	11	11
115	00	00	00	00	00	00	10	10	10	00	00	00	00	00	00	00	00	00	00	00	00	00	00	00	00	00	00	90	00	00	00	00	00	00	00	00	00	00	00	90	00	00	00	00	00	00	00	00	00
116	01	01	01	01	01	01	01	01	01	01	01	01	01	01	01	01	01	01	01	01	01	01	01	01	01	01	01	91	01	01	01	01	01	01	01	01	01	01	01	01	01	01	01	01	01	01	01	01	01
117	11	11	11	11	11	11	11	11	11	11	11	11	11	11	11	11	11	11	11	11	11	11	11	11	11	11	11	91	11	11	11	11	11	11	11	11	11	11	11	11	11	11	11	11	11	11	11	11	11
118	11	11	11	11	11	11	11	11	11	11	11	11	11	11	11	11	11	11	11	11	11	11	11	11	11	11	11	91	11	11	11	11	11	11	11	11	11	11	11	11	11	11	11	11	11	11	11	11	11
119	01	01	01	01	01	01	01	01	01	01	01	01	01	01	11	11	01	01	01	01	01	01	01	01	01	01	01	91	01	01	01	01	01	01	01	01	01	01	01	91	01	01	01	01	01	01	01	01	01
120	01	01	01	01	01	01	01	01	01	01	01	01	01	01	01	01	01	01	01	01	01	01	01	01	01	01	01	91	01	01	01	01	01	01	01	01	01	01	01	91	01	01	01	01	01	01	01	01	01
121	11	11	11	11	11	11	11	11	11	11	11	11	11	11	11	11	11	11	11	11	11	11	11	11	11	11	11	91	11	11	11	11	11	11	11	11	11	11	11	11	11	11	11	11	11	11	11	11	11
122	00	00	00	00	00	00	00	00	00	00	00	00	00	00	00	00	00	00	00	00	00	00	00	00	00	00	00	90	00	00	00	00	09	09	00	01	01	01	01	01	01	01	01	01	00	00	00	00	00
125	01	01	01	01	01	01	01	01	01	01	01	01	01	01	11	11	01	01	01	01	01	01	01	01	01	01	01	91	01	01	01	01	01	01	01	01	01	01	11	11	11	11	11	11	11	11	11	11	11
126	01	01	01	01	01	01	01	01	01	01	01	01	01	01	01	01	01	01	01	01	01	01	01	01	01	01	01	91	01	01	01	01	01	01	01	01	01	01	01	01	01	01	01	01	01	01	01	01	01
127	11	11	11	11	11	11	11	11	11	11	11	11	11	11	11	11	11	11	11	11	11	11	11	11	11	11	11	91	11	11	11	11	11	11	11	11	11	11	11	11	11	11	11	11	11	11	11	11	11
128	01	01	01	01	01	01	01	01	01	01	01	01	01	01	01	01	01	01	01	01	01	01	01	01	01	01	01	91	01	01	01	01	01	01	01	01	01	01	01	01	01	01	01	01	01	01	01	91	01
129	01	01	01	01	01	01	01	01	01	01	01	01	01	01	01	01	01	01	01	01	01	01	01	01	01	01	01	91	01	01	01	01	01	01	01	01	01	01	01	91	01	01	01	01	01	01	01	91	01
131	11	11	11	11	11	11	11	11	11	11	11	11	11	11	11	11	11	11	11	11	11	11	11	11	11	11	11	91	11	11	11	11	11	11	11	11	11	11	11	91	11	11	11	11	11	11	11	91	11
132	01	01	01	00	00	00	00	00	00	00	00	00	00	00	00	00	00	00	00	00	01	01	01	01	01	01	01	91	01	01	01	00	00	00	00	00	00	00	00	90	00	00	00	00	00	00	00	90	00
133	01	01	01	01	01	01	01	01	01	01	01	01	01	01	01	01	01	01	01	01	01	01	01	01	01	01	01	91	01	01	01	01	01	01	01	01	01	01	01	91	01	01	01	01	01	01	01	91	01
134	01	01	01	01	01	01	01	01	01	01	01	01	01	01	01	01	01	01	01	01	01	01	01	01	01	01	01	91	01	01	01	01	01	01	01	01	01	01	01	91	01	01	01	01	01	01	01	91	01
135	00	00	00	00	00	00	00	00	00	00	00	00	00	00	00	00	00	00	00	00	00	00	00	00	00	00	00	90	00	00	00	00	00	00	00	00	00	00	00	90	00	00	00	00	00	00	00	90	00
136	01	01	01	01	01	01	01	01	01	01	01	01	01	01	01	01	01	01	01	01	01	01	01	01	01	01	01	91	01	01	01	01	01	01	01	01	01	01	01	91	01	01	01	01	01	01	01	91	01
137	00	00	00	00	00	00	00	00	00	00	00	00	00	00	10	10	00	00	00	00	00	00	00	00	00	00	00	90	00	00	00	00	00	00	00	00	00	00	00	90	00	00	00	00	00	00	00	90	00
138	01	01	01	11	11	11	11	11	11	11	11	11	01	01	01	01	01	01	01	01	01	01	01	01	01	01	11	91	11	11	11	11	11	11	11	01	01	01	01	91	01	01	01	01	01	01	01	01	01
139	01	01	01	11	11	11	11	11	11	01	01	01	01	01	01	01	01	01	01	01	01	01	01	01	01	01	01	91	01	01	01	01	01	01	01	01	01	01	01	91	01	01	01	01	01	01	01	01	01
140	11	11	11	00	00	00	00	00	00	11	11	11	11	11	00	00	11	11	11	11	00	00	00	00	00	00	11	91	11	11	11	11	11	11	11	00	00	00	00	90	00	00	00	00	00	00	00	00	00
141	01	01	01	01	01	01	01	01	01	01	01	01	01	01	01	01	01	01	01	01	01	01	01	01	01	01	01	91	01	01	01	01	01	01	01	01	01	01	01	91	01	01	01	01	01	01	01	91	01
142	11	11	11	11	11	11	11	11	11	11	11	11	11	11	11	11	11	11	11	11	11	11	11	11	11	11	11	91	11	11	11	11	11	11	11	11	11	11	11	91	11	11	11	11	11	11	11	11	11
144	11	11	11	11	11	11	11	11	11	11	11	11	11	11	11	11	11	11	11	11	01	01	01	01	01	01	11	91	11	11	11	11	11	11	11	11	11	11	11	91	11	11	11	11	11	11	11	11	11
145	01	01	01	01	01	01	01	01	01	01	01	01	01	01	01	01	01	01	01	01	01	01	01	01	01	01	01	91	01	01	01	01	01	01	01	01	01	01	01	91	01	01	01	01	01	01	01	01	01
146	11	11	11	11	11	11	11	11	11	11	11	11	11	11	11	11	11	11	11	11	11	11	11	11	11	11	11	91	11	11	11	11	11	11	11	11	11	11	11	91	11	11	11	11	11	11	11	91	11
148	01	01	01	01	01	01	01	01	01	01	01	01	01	01	01	01	01	01	01	01	01	01	01	01	01	01	01	91	01	01	01	01	01	01	01	01	01	01	01	91	01	01	01	01	01	01	01	01	01
149	01	01	01	01	01	01	01	01	01	01	01	01	01	01	11	11	01	01	01	01	11	11	11	11	11	11	01	91	01	01	01	01	01	01	01	01	01	01	01	91	01	01	01	01	01	01	01	01	01
150	01	01	01	01	01	01	01	01	01	01	01	01	01	01	01	01	01	01	01	01	01	01	01	01	01	01	01	91	01	01	01	01	01	01	01	01	01	01	01	91	01	01	01	01	01	01	01	91	01
151	11	11	11	01	01	01	01	01	01	11	11	11	01	01	01	01	01	01	01	01	11	11	11	11	11	11	01	91	01	01	01	01	01	01	01	01	01	01	01	01	01	01	01	01	01	01	01	91	01
153	11	11	91	11	11	11	11	11	11	11	11	11	11	11	11	11	11	11	11	11	11	11	11	11	11	11	11	11	11	11	11	11	11	11	11	19	11	11	11	11	11	11	91	11	11	11	11	11	11
154	01	01	91	01	01	01	01	01	01	01	01	01	01	01	01	01	11	11	11	11	01	01	01	01	01	01	01	01	01	01	01	01	01	01	01	09	01	01	01	01	01	01	91	01	01	01	01	01	01
156	01	01	91	01	01	01	01	01	01	01	01	01	01	01	01	11	01	01	01	01	01	01	01	01	01	01	01	01	01	01	01	01	01	01	01	09	01	01	01	01	01	01	91	01	01	01	01	01	01
157	10	10	90	10	10	10	10	10	10	10	10	10	10	10	10	10	10	10	10	10	10	10	10	10	10	10	10	10	10	10	10	10	10	10	10	19	10	10	10	10	10	10	90	10	10	10	10	10	10
158	11	11	91	11	11	11	11	11	11	11	11	11	11	11	11	11	11	11	11	11	11	11	11	11	11	11	11	11	11	11	11	11	11	11	11	19	11	11	11	11	11	11	91	11	11	11	11	11	11
159	00	00	90	00	00	00	00	00	10	00	00	00	00	00	00	00	00	00	00	00	00	00	00	00	00	00	00	00	00	00	00	00	00	00	00	09	00	00	00	00	00	00	00	00	00	00	00	00	00
160	11	11	91	11	11	11	11	11	11	11	11	11	11	11	11	11	11	11	11	11	11	11	11	11	11	11	11	11	11	11	11	11	11	11	11	19	11	11	11	11	11	11	91	11	11	11	11	11	11
161	00	00	90	00	00	00	00	00	00	00	00	00	00	00	00	00	00	00	00	00	00	00	00	00	00	00	00	00	00	00	00	00	00	00	00	09	00	00	00	10	00	10	90	10	00	00	00	00	00
162	11	11	91	11	11	11	11	11	11	11	11	11	11	11	11	11	11	11	11	11	11	11	11	11	11	11	11	11	11	11	11	11	11	11	11	19	11	11	11	11	11	11	91	11	11	11	11	11	11
163	11	11	91	11	11	11	11	11	11	11	11	11	11	11	11	11	11	11	11	11	11	11	11	11	11	11	11	11	11	11	11	11	11	11	11	19	11	11	11	11	11	11	91	11	11	11	11	11	11
164	01	01	01	01	01	01	01	01	01	01	01	01	01	01	01	01	01	01	01	01	01	01	01	01	01	01	01	01	01	01	01	01	01	01	01	09	01	01	01	01	01	01	91	01	01	01	01	01	01
168	11	11	91	01	01	01	01	01	01	01	01	01	01	01	01	01	11	11	11	11	01	01	01	01	01	01	11	11	11	11	11	01	01	01	01	09	01	01	11	11	11	11	91	11	01	01	01	01	01
169	11	11	91	11	11	11	11	11	11	00	00	00	00	00	11	11	11	11	11	11	11	11	11	11	11	11	11	11	11	11	11	11	11	11	11	19	11	11	11	11	11	11	91	11	11	11	11	11	11
170	11	11	91	11	11	11	11	11	11	11	11	11	11	11	11	11	11	11	11	11	11	11	11	11	11	11	11	11	11	11	11	11	11	11	11	19	11	11	11	11	11	11	91	11	11	11	11	11	11
171	01	01	91	01	01	01	01	01	01	01	01	01	01	01	01	01	01	01	01	01	01	01	01	01	01	01	01	01	01	01	01	01	01	01	01	09	01	01	01	01	01	01	91	01	01	01	01	01	01
172	11	11	91	11	01	11	11	11	11	11	11	11	00	11	11	11	11	11	11	11	11	11	11	11	11	11	11	11	11	11	11	11	11	11	11	19	11	11	11	11	11	11	91	11	11	11	11	11	11
173	11	11	91	11	11	11	11	11	11	11	11	11	11	11	11	11	11	11	11	11	11	11	11	11	11	11	11	11	11	11	11	11	11	11	11	19	11	11	11	11	11	11	91	11	11	11	11	11	11
174	11	11	91	11	11	11	11	11	11	11	11	11	11	11	11	11	11	11	11	11	11	11	11	11	11	11	11	11	11	11	11	11	11	11	11	19	11	11	11	11	11	11	91	11	11	11	11	11	11
175	11	11	91	11	11	11	11	11	11	11	11	11	11	11	11	11	11	11	11	11	11	11	11	11	11	11	11	11	11	11	11	11	11	11	11	19	11	11	11	11	11	11	91	11	11	11	11	11	11
176	11	11	91	11	91	11	11	11	11	11	11	11	11	11	11	11	11	11	11	11	11	11	11	11	11	11	11	11	11	11	11	11	11	11	11	19	11	01	01	01	01	01	91	01	01	01	01	01	01
178	01	01	91	01	01	01	01	01	01	01	01	01	01	01	01	01	01	01	01	01	01	01	01	01	01	01	01	01	01	01	01	01	01	01	01	09	01	01	01	01	01	01	91	01	01	01	01	01	01
179	11	11	91	11	11	11	11	11	11	11	11	11	11	11	11	11	11	11	11	11	11	11	11	11	11	11	11	11	11	11	11	11	11	11	11	19	11	11	11	11	11	11	91	11	11	11	11	11	11
180	11	11	91	11	11	11	11	11	11	11	11	11	11	11	11	11	11	11	11	11	11	11	11	11	11	11	11	11	11	11	11	11	11	11	11	19	11	11	11	11	11	11	91	11	11	11	11	11	11
182	01	01	91	01	01	01	01	01	01	01	01	01	01	01	01	01	01	01	01	01	01	01	01	01	01	01	01	01	01	01	01	01	01	01	01	09	01	01	01	01	01	01	91	01	01	01	01	01	01
184	11	11	11	11	11	11	11	11	11	11	11	11	11	11	11	11	11	11	11	11	11	11	11	11	11	11	11	11	11	11	11	11	11	11	11	19	11	11	11	11	11	11	11	11	11	11	11	11	11
185	01	01	91	01	01	01	01	01	01	91	01	91	01	01	01	11	01	01	01	01	01	01	01	01	01	01	01	01	01	01	01	11	11	11	11	09	01	01	01	01	01	01	01	01	01	01	01	01	01
187	11	11	91	11	11	11	11	11	11	11	11	11	11	11	11	11	11	11	11	11	11	11	11	11	11	11	11	11	11	11	11	11	11	11	11	19	11	11	11	11	11	11	91	11	11	11	11	11	11
188	01	01	91	01	01	01	01	01	01	01	01	01	01	01	01	01	01	01	01	01	01	01	01	01	01	01	01	01	01	01	01	01	01	01	01	09	01	01	01	01	01	01	91	01	01	01	01	01	01
189	01	01	91	11	11	11	11	11	11	11	11	11	11	11	11	11	11	11	11	11	01	01	11	01	11	11	01	01	91	91	01	11	11	11	11	19	11	11	01	01	01	01	91	01	01	01	01	01	01
190	01	01	91	01	01	01	01	01	01	01	01	01	01	01	11	11	01	01	01	01	11	11	11	11	11	11	01	01	01	01	01	01	01	01	01	09	01	01	01	01	01	01	91	01	01	01	01	01	01
191	00	00	90	00	00	00	00	00	00	00	00	00	00	00	00	00	00	00	00	00	00	00	00	00	00	00	00	90	10	10	00	00	00	90	00	09	00	00	00	00	00	00	90	00	00	00	00	00	00
192	00	00	90	00	00	00	00	00	00	00	00	00	00	00	00	00	00	00	00	00	00	00	00	00	00	00	00	00	00	00	00	00	00	90	00	09	00	00	00	00	00	00	90	00	00	00	00	00	00
194	11	11	91	11	11	11	11	11	11	11	11	11	11	11	11	11	11	11	11	11	11	11	11	11	11	11	11	11	11	11	11	11	11	11	11	19	11	11	11	11	11	11	91	11	11	11	11	11	11
195	01	01	91	01	01	01	01	01	01	01	01	01	01	01	01	01	01	01	01	01	01	01	01	01	01	01	01	01	01	01	01	01	01	01	01	09	01	01	01	01	01	01	91	01	01	01	01	01	01
197	11	11	91	11	11	11	11	11	11	11	11	11	11	11	11	11	11	11	11	11	11	11	11	11	11	11	11	11	11	11	11	11	11	11	11	19	11	11	11	11	11	11	91	11	11	11	11	11	11
198	11	11	91	11	11	11	11	11	11	11	11	11	11	11	11	11	11	11	11	11	11	11	11	11	11	11	11	11	11	11	11	11	11	11	11	19	11	11	11	11	11	11	91	11	11	11	11	11	11
199	11	11	91	11	11	11	11	11	11	11	11	11	11	11	11	11	11	11	11	11	11	11	11	11	11	11	11	11	11	11	11	11	11	11	11	19	11	11	11	11	11	11	91	11	11	11	11	11	11
201	11	11	91	11	11	11	11	11	11	11	11	11	11	11	11	11	11	11	11	11	11	11	11	11	11	11	11	11	11	11	11	11	11	11	11	19	11	11	11	11	11	11	91	11	11	11	11	11	11
203	01	01	91	01	01	01	01	01	01	01	01	01	01	01	01	01	01	01	01	01	01	01	01	01	01	01	01	01	01	01	01	01	01	01	01	19	11	91	11	11	11	11	91	11	11	11	11	11	11
204	01	01	91	01	01	01	01	01	01	01	01	01	01	01	01	01	01	01	01	01	01	01	01	01	01	01	01	01	01	01	01	01	01	01	01	09	01	91	11	11	11	11	91	11	11	11	11	11	11
205	01	01	91	11	11	11	11	11	11	11	11	11	11	11	01	01	11	11	11	11	11	11	11	11	11	11	11	11	11	11	11	11	11	11	11	09	11	91	11	11	11	11	91	11	11	11	11	11	11
207	01	01	91	01	01	01	01	01	01	01	01	01	01	01	01	01	01	01	01	01	01	01	01	01	01	01	01	01	01	01	01	01	01	01	01	09	01	01	01	01	01	01	91	01	01	01	01	01	01
208	01	01	91	01	01	01	01	01	01	01	01	01	01	01	01	01	01	01	01	01	01	01	01	01	01	01	01	01	01	01	01	01	01	01	01	09	01	01	01	01	01	01	91	01	01	01	01	01	01
209	11	11	91	11	11	11	11	11	11	11	11	11	11	11	11	11	11	11	11	11	11	11	11	11	11	11	11	11	11	11	11	11	11	11	11	19	11	11	11	11	11	11	91	11	11	11	11	11	11
210	11	11	91	11	11	11	11	11	11	11	11	11	11	11	11	11	11	11	11	11	11	11	11	11	11	11	11	11	11	11	11	11	11	11	11	19	11	11	11	11	11	11	91	11	11	11	11	11	11
211	11	11	91	11	11	11	11	11	11	01	01	01	01	01	11	11	01	01	01	01	11	11	11	11	11	11	01	01	01	01	01	11	11	11	11	19	11	11	11	11	11	11	91	11	11	11	11	11	11
212	00	00	90	00	00	00	00	00	00	00	00	00	00	00	11	11	00	00	00	00	00	00	00	00	00	09	00	00	00	00	00	00	00	00	00	09	00	00	00	00	00	00	90	00	00	00	00	00	00
214	11	11	91	11	11	11	11	11	11	11	11	11	11	11	11	11	11	11	11	11	11	11	11	11	11	11	11	11	11	11	11	11	11	11	11	19	11	11	11	11	11	11	91	11	11	11	11	11	11
216	01	01	91	01	01	01	01	01	01	01	01	01	01	01	01	01	01	01	01	01	01	01	01	01	01	01	01	01	01	01	01	01	01	01	01	09	01	01	01	01	01	01	91	01	01	01	01	01	01
217	00	00	90	00	90	00	00	00	00	00	00	00	00	00	00	00	00	00	00	00	00	00	00	00	00	00	00	10	10	10	10	00	00	00	00	19	10	90	00	90	00	10	90	10	00	90	00	00	90
221	11	11	91	11	11	11	11	11	11	11	11	11	11	11	11	11	11	11	11	11	11	11	11	11	11	11	11	11	11	11	11	11	11	11	11	19	11	11	11	11	11	11	91	11	11	11	11	11	11
222	00	00	90	00	90	90	00	00	00	10	10	10	00	00	00	00	10	10	00	10	00	00	10	10	00	00	00	00	00	00	00	10	00	00	10	09	00	00	00	00	00	00	90	00	00	00	00	00	00
223	01	01	91	01	01	01	01	01	01	01	01	01	01	01	01	01	01	01	01	01	01	01	01	01	01	01	01	01	01	01	01	01	01	01	01	09	01	01	01	01	01	01	91	01	01	01	01	01	01
224	01	01	91	11	11	11	11	11	11	01	01	01	01	01	01	01	01	01	01	01	01	01	01	01	01	01	01	01	01	01	01	11	11	11	11	09	01	91	01	01	01	01	91	01	01	01	01	01	01
225	01	01	91	01	01	01	01	01	01	01	01	01	01	01	01	01	01	01	01	01	01	01	01	01	01	01	01	01	01	01	01	01	01	01	01	09	01	01	01	01	01	01	91	01	01	01	01	01	01
226	11	11	91	11	11	11	11	11	11	11	11	11	11	11	11	11	11	11	11	11	11	11	11	11	11	11	11	11	11	11	11	11	11	11	11	19	11	11	11	11	11	11	91	11	11	11	11	11	11
227	01	01	91	01	01	01	01	01	01	01	01	01	01	01	01	01	01	01	01	01	01	01	01	01	01	01	01	01	01	01	01	01	01	01	01	09	01	01	01	01	01	01	91	01	01	01	01	01	01
228	00	00	90	00	00	00	00	00	00	00	00	00	00	00	00	00	00	00	00	00	00	00	00	00	00	00	00	00	00	00	00	00	00	00	00	09	00	00	00	00	00	00	90	00	00	00	00	00	00
229	01	01	91	01	01	01	01	01	01	01	01	01	01	01	01	01	01	01	01	01	01	01	01	01	01	01	01	01	01	01	01	01	01	01	01	09	01	01	01	01	01	01	91	01	01	01	01	01	01
230	11	11	91	11	11	11	11	11	11	11	11	11	11	11	11	11	11	11	11	11	11	11	11	11	11	11	11	11	11	11	11	11	11	11	11	19	11	11	11	11	11	11	91	11	11	11	11	11	11
231	11	11	91	11	11	11	11	11	11	11	11	11	11	11	11	11	11	11	11	11	11	11	11	11	11	11	11	11	11	11	11	11	11	11	11	19	11	11	11	11	11	11	91	11	11	11	11	11	11
232	01	01	91	01	01	01	01	01	01	01	01	01	01	01	01	01	01	01	01	01	01	01	01	01	01	01	01	01	01	01	01	01	01	01	01	09	01	01	01	01	01	01	91	01	01	01	01	01	01
233	11	11	91	11	11	11	11	11	11	11	11	11	11	11	11	11	11	11	11	11	11	11	11	11	11	11	11	11	11	11	11	11	11	11	11	19	11	11	11	11	11	11	91	11	11	11	11	11	11
234	11	11	91	11	11	11	11	11	11	11	11	11	11	11	11	11	11	11	11	11	11	11	11	11	11	11	11	11	11	11	11	11	11	11	11	19	11	11	11	11	11	11	91	11	11	11	11	11	11
235	11	11	91	11	11	11	11	11	11	11	11	11	11	11	11	11	11	11	11	11	11	11	11	11	11	11	11	11	11	11	11	11	11	11	11	19	11	11	11	11	11	11	91	11	11	11	11	11	11
236	01	01	91	01	01	01	01	01	01	01	01	01	01	01	01	01	01	01	01	01	01	01	01	01	01	01	01	01	01	01	01	01	01	01	01	09	01	01	01	01	01	01	91	01	01	01	01	01	01
237	01	01	91	01	01	01	01	01	01	01	01	01	01	01	01	01	01	01	01	01	01	01	01	01	01	01	01	01	01	01	01	01	01	01	01	09	01	01	01	01	01	01	91	01	01	01	01	01	01
238	11	11	91	11	11	11	11	11	11	11	11	11	11	11	11	11	11	11	11	11	11	11	11	11	11	11	11	11	11	11	11	11	11	11	11	19	11	11	11	11	11	11	91	11	11	11	11	11	11
239	01	01	91	01	01	01	01	01	01	01	01	01	01	01	01	01	01	01	01	01	01	01	01	01	01	01	01	01	01	01	01	01	01	01	01	09	01	01	01	01	01	01	91	01	01	01	01	01	01
240	01	01	91	01	91	01	01	01	01	01	01	01	01	01	01	01	01	01	01	01	01	01	01	01	01	01	01	01	01	01	01	01	01	01	01	09	01	91	11	11	11	11	91	11	11	11	11	91	11
241	10	00	90	10	00	10	00	00	00	00	00	00	00	00	00	00	00	00	00	00	00	00	00	00	00	00	00	00	00	00	00	00	00	00	00	09	00	90	00	00	00	00	90	00	00	10	10	90	10
242	00	00	90	00	11	00	11	00	11	00	00	00	00	00	00	00	00	00	00	00	00	00	00	00	00	00	00	00	00	00	00	00	00	00	00	00	00	00	00	00	00	00	00	00	00	00	00	00	00
245	11	11	91	11	11	11	11	11	11	11	11	11	11	11	11	11	11	11	11	11	11	11	11	11	11	11	11	11	11	11	11	11	11	11	11	19	11	11	11	11	11	11	91	11	11	11	11	11	11
247	01	01	91	01	01	01	01	01	01	01	01	01	01	01	01	01	01	01	01	01	01	01	01	01	01	01	01	01	01	01	01	01	01	01	01	09	01	01	01	01	01	01	91	01	01	01	01	01	01
248	10	10	90	10	10	10	10	10	10	10	10	10	10	10	10	10	10	10	10	10	10	10	10	10	10	10	10	10	10	10	10	10	10	10	10	19	10	10	10	10	10	10	90	10	10	10	10	10	10
249	01	01	91	01	01	01	01	01	01	01	01	01	01	01	01	01	01	01	01	01	01	01	01	01	01	01	01	01	01	01	01	01	01	01	01	09	01	01	01	01	01	01	91	01	01	01	01	01	01
251	01	01	91	01	01	01	01	01	01	11	11	11	01	01	01	01	11	91	01	11	01	01	11	11	01	01	01	01	01	01	01	11	01	11	11	09	01	91	01	01	01	11	91	01	01	91	01	91	01
252	01	01	91	01	91	01	01	01	01	01	01	01	01	01	01	01	01	01	01	01	01	01	01	01	01	01	01	01	01	01	01	01	01	01	01	09	01	01	01	01	01	01	91	01	01	01	01	91	01
253	00	00	90	00	90	00	00	00	00	00	00	00	00	00	00	00	00	00	00	00	10	10	10	10	10	10	00	00	00	00	00	00	00	00	00	09	00	00	00	00	00	00	90	00	00	00	00	90	00
254	11	11	91	11	11	11	11	11	11	11	11	11	11	11	11	11	11	11	11	11	11	11	11	11	11	11	11	11	11	11	11	11	11	11	11	19	11	11	11	11	11	11	91	11	11	11	11	11	11
255	01	01	91	01	91	01	01	01	01	01	01	01	01	01	01	01	01	01	01	01	01	01	01	01	01	01	11	11	11	11	11	01	01	01	01	09	01	01	01	01	01	01	91	01	01	01	01	01	01
256	01	01	91	01	91	01	01	01	01	01	01	01	01	01	01	01	01	01	01	01	01	01	01	01	01	01	01	01	01	01	01	01	01	01	01	09	01	01	01	01	01	01	91	01	01	01	01	01	01
257	01	01	91	01	91	01	01	01	01	01	01	01	01	01	01	01	01	01	01	01	01	01	01	01	11	01	01	01	01	01	01	01	01	11	01	09	01	01	01	01	01	01	91	01	01	01	01	01	01
258	01	01	91	01	91	01	01	01	01	01	01	01	01	01	01	01	01	01	01	01	01	01	01	01	01	01	01	01	01	01	01	01	01	01	01	09	01	01	01	01	01	01	91	01	01	01	01	01	01
259	11	11	91	11	11	11	11	11	11	11	11	11	11	11	11	11	11	11	11	11	11	11	11	11	11	11	11	11	11	11	11	11	11	11	11	19	11	11	11	11	11	11	91	11	11	11	11	11	11
260	11	11	91	11	11	11	11	11	11	11	11	11	11	11	11	11	11	11	11	11	11	11	11	11	11	11	11	11	11	11	11	11	11	11	11	19	11	11	11	11	11	11	91	11	11	11	11	11	11
261	01	01	91	01	91	01	01	01	01	01	01	01	01	01	01	01	01	01	01	01	01	01	01	01	01	01	01	01	01	01	01	01	01	01	01	09	01	01	01	01	01	01	91	01	01	01	01	01	01
263	00	00	90	00	00	00	00	00	00	00	00	00	00	00	00	00	00	00	00	00	00	00	00	00	00	00	00	00	00	00	00	00	10	00	00	09	00	00	00	00	00	00	90	00	00	00	00	00	00
264	01	01	91	01	01	01	01	01	01	11	11	11	01	01	01	01	01	01	01	11	01	01	91	11	01	01	01	01	01	01	01	11	01	11	11	09	01	01	01	01	01	01	91	01	01	01	01	01	01
265	01	01	91	11	11	11	11	11	11	01	01	01	01	01	01	01	01	01	01	01	01	01	01	01	01	01	01	01	01	01	01	01	01	11	01	09	01	91	01	01	01	01	91	01	01	01	01	01	01
266	01	01	91	01	91	01	01	01	01	01	01	01	01	01	01	01	11	11	11	11	01	01	01	01	01	01	01	01	01	01	01	01	01	01	01	09	01	01	01	01	01	01	91	01	01	01	01	01	01
267	01	01	91	01	91	01	01	01	01	01	01	01	01	01	01	01	01	01	01	01	01	01	01	01	01	01	01	01	01	01	01	01	01	01	01	09	01	01	01	01	01	01	91	01	01	01	01	01	01
268	01	01	91	01	91	01	01	01	01	01	01	01	01	01	01	01	01	01	01	01	01	01	01	01	01	01	01	01	01	01	01	01	01	01	01	09	01	01	01	01	01	01	91	01	01	01	01	01	01
270	01	01	91	01	01	01	01	01	01	11	11	11	11	11	11	11	11	11	11	11	01	01	01	01	01	01	11	11	11	11	11	11	11	11	11	09	01	91	01	01	01	01	91	01	01	01	01	01	01
271	00	00	90	00	00	00	00	00	00	00	00	00	00	00	00	00	00	00	00	00	00	00	00	00	00	00	00	00	00	00	00	00	11	00	00	00	00	00	00	00	00	00	90	00	00	00	00	00	00
272	11	11	91	11	11	11	11	11	11	11	11	11	11	11	11	11	11	11	11	11	11	11	11	11	11	11	11	11	11	11	11	11	11	11	11	19	11	11	11	11	11	11	91	11	11	11	11	11	11
273	11	11	91	11	11	11	11	11	11	11	11	11	11	11	11	11	11	11	11	11	11	11	11	11	11	11	11	11	11	11	11	11	11	11	11	19	11	11	11	11	11	11	91	11	11	11	11	11	11
[truncated: 46 more columns]
